# Supplementary material
Source: PubMed Central journal article supplement (PMC8827032)
Supplement: jvi.01785-21-s0001.pdf [file jvi.01785-21-s0001.pdf]

**TABLE S1. Information on rhesus macaques enrolled in this study**

| <b>groups</b>         | <b>ID</b> | <b>Gender</b> | <b>Plasma VL<br/>(lg copies/ml)</b> | <b>Weight<br/>(kg)</b> | <b>Age<br/>(year)</b> |
|-----------------------|-----------|---------------|-------------------------------------|------------------------|-----------------------|
| $\alpha$ PD-1+Vaccine | 031496R   | female        | 7.5                                 | 4.7                    | 15                    |
|                       | 80085     | male          | 6.7                                 | 6.4                    | 10                    |
|                       | 120308    | female        | 6.2                                 | 7.7                    | 6                     |
|                       | 80259     | male          | 4.7                                 | 9.1                    | 10                    |
| Vaccine-only          | 80094     | female        | 7.0                                 | 5.8                    | 10                    |
|                       | 31137     | male          | 6.4                                 | 10.3                   | 15                    |
|                       | 4149      | male          | 6.1                                 | 10.1                   | 14                    |
|                       | 130402    | female        | 4.4                                 | 7.7                    | 5                     |
| Control               | 124019    | male          | 5.1                                 | 9.8                    | 8                     |
|                       | 124073    | male          | 6.4                                 | 10.9                   | 8                     |
|                       | 50068     | female        | 6.2                                 | 6.4                    | 15                    |
|                       | 50031     | male          | 6.5                                 | 9.0                    | 15                    |

**TABLE S2. Antibodies used for flow cytometry in this study**

| <b>Antigen</b> | <b>Clone</b>   | <b>Fluorophore</b> | <b>Supplier</b> | <b>Staining</b> | <b>Reactivity</b> |
|----------------|----------------|--------------------|-----------------|-----------------|-------------------|
| CD3            | SP34-2         | Pacific Blue       | BD Biosciences  | Surface         | Human/NHP         |
| CD3            | SP34-2         | PerCP              | BD Biosciences  | Surface         | Human             |
| CD4            | L200           | PE-CF594           | BD Biosciences  | Surface         | Human             |
| CD4            | L200           | FITC               | BD Biosciences  | Surface         | Human             |
| CD4            | L200           | APC                | BD Biosciences  | Surface         | Human             |
| CD8            | RPA-T8         | APC-Cy7            | BD Biosciences  | Surface         | Human             |
| CD28           | CD28.2         | FITC               | BD Biosciences  | Surface         | Human/NHP         |
| CD95           | DX2            | PE-Cy5             | BD Biosciences  | Surface         | Human             |
| IFN- $\gamma$  | 4S.B3          | PE                 | BD Biosciences  | Intracellular   | Human             |
| TNF- $\alpha$  | MAb11          | PE-Cy7             | BD Biosciences  | Intracellular   | Human             |
| IL-2           | MQ1-17H12      | APC                | BD Biosciences  | Intracellular   | Human/NHP         |
| CD38           | H1T2           | FITC               | BD Biosciences  | Surface         | Human             |
| CD195(CCR5)    | 3A9            | PE                 | BD Biosciences  | Surface         | Human             |
| CD69           | FN50           | PE                 | BD Biosciences  | Surface         | Human             |
| Ki-67          | B56            | PE                 | BD Biosciences  | Intracellular   | Human             |
| CD25           | CD25-4E3       | APC                | eBioscience     | Surface         | Human/NHP         |
| CD279(PD-1)    | eBioJ105(J105) | PE-eFluor610       | eBioscience     | Surface         | Human             |
| HLA-DR         | G46-6          | PE                 | BD Biosciences  | Surface         | Human             |
| Blimp-1        | 6D3            | PE                 | BD Biosciences  | Intracellular   | Hu/Mouse          |
| CD127(IL-7R)   | HIL-7R-M21     | PE                 | BD Biosciences  | Surface         | Human             |
| Foxp3          | 259D/C7        | PE                 | BD Biosciences  | Intracellular   | Human             |

**TABLE S3. Primers for qPCR in this study**

| <b>Target gene</b>      | <b>Primer sequence ( 5' to 3' )</b>       |
|-------------------------|-------------------------------------------|
| Plasma SIV RNA          | Forward: AATACTGTCTGCGTCATCTGG            |
|                         | Reverse: ATGGTGCTGTTGGTCTACTTG            |
| Cell associated msRNA   | msRNA-1F: GAAGAAGAACTCCGAAAAAGG           |
|                         | msRNA-R: GCTGTTGCCACCGCC                  |
|                         | msRNA-2F: CTAATACATCTTCTGCATCAAAC         |
|                         | HIV/SIV MS probe9066: ATATCCAACAGGACCCGGC |
| Cell associated usRNA   | U1-5F: AAATACTTTTCGGTCTTAGCTCCATT         |
|                         | U1-3R: TAATTTCTCCTCTGCCGCTAG              |
|                         | U2-5F: CATTAGTGCCAACAGGCTCAGA             |
|                         | U2-3R: GTTGGTCTACTTGTTTTTGGCATAG          |
| Cell associated SIV DNA | Forward: AATACTGTCTGCGTCATCTGG            |
|                         | Reverse: ATGGTGCTGTTGGTCTACTTG            |

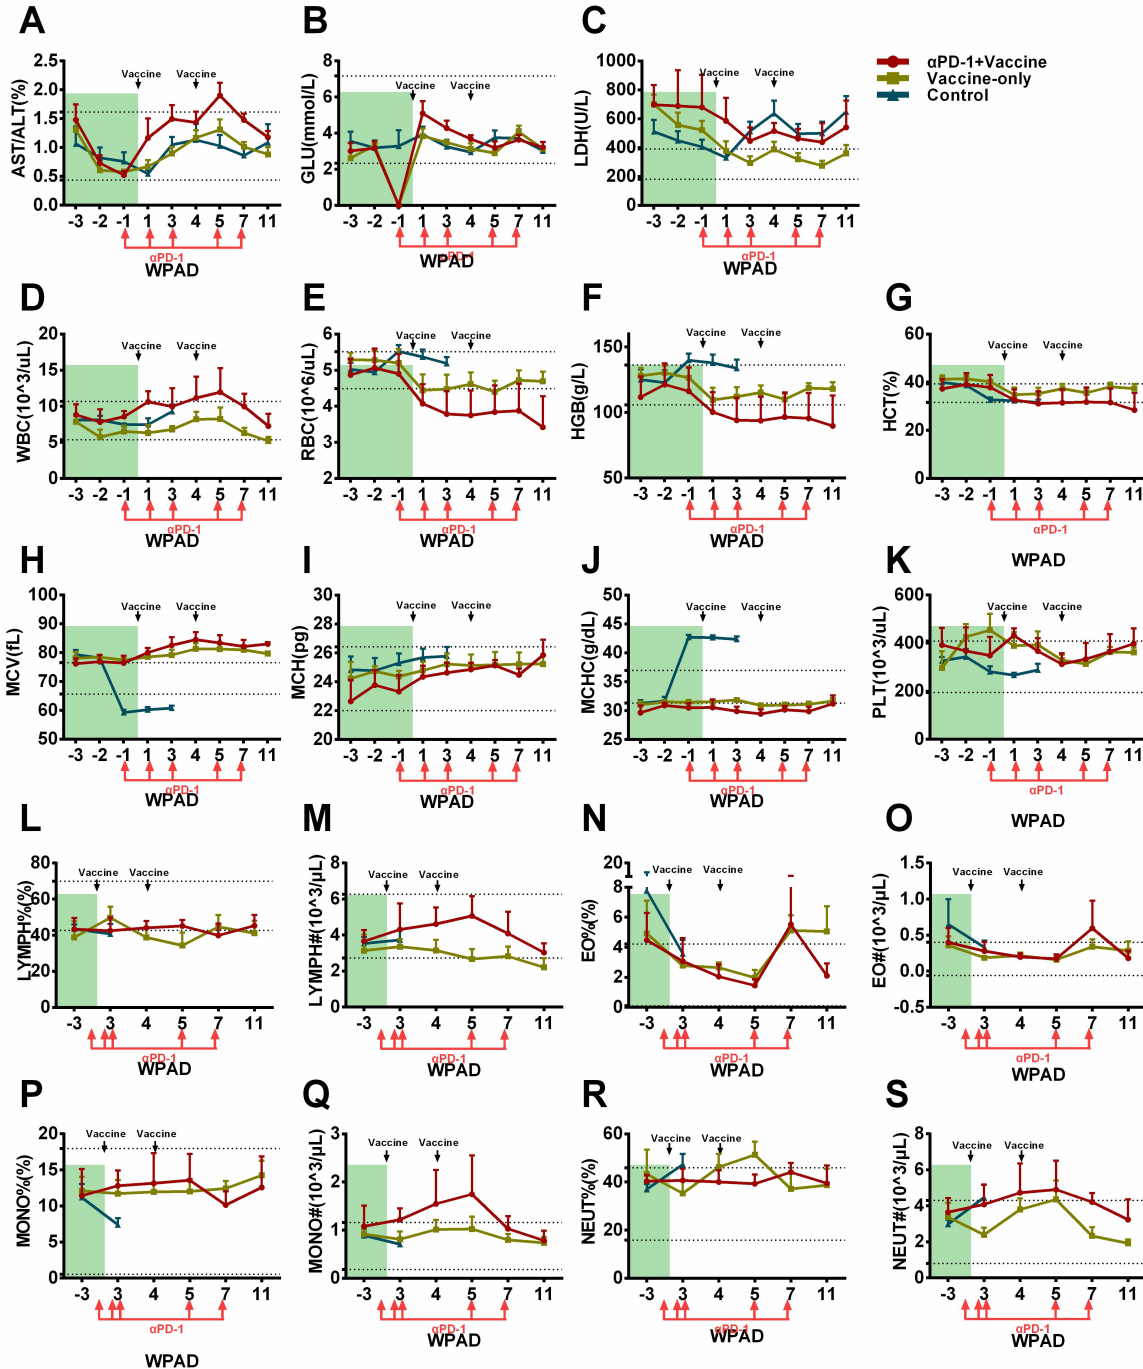

**Figure S1. Serum biochemistry and hematology of Rhesus macaques during this study.**

(A) Ratio of ALT to AST in plasma. (B) Glucose (GLU) content in the plasma. (C) The concentration of lactate dehydrogenase (LDH) in the plasma. (D) White blood cells (WBC) content in the blood. (E) Red blood cell (RBC) content in the blood. (F) Hemoglobin (HGB)

content in the blood. **(G)** Hematocrit (HCT) content in the blood. **(H)** Mean corpuscular volume (MCV) content in the blood. **(I)** Mean corpuscular hemoglobin (MCH) content in the blood. **(J)** Mean corpuscular hemoglobin concentration (MCHC) content in the blood. **(K)** Platelet (PLT) content in the blood. **(L)** Ratio of LYM to WBC in blood. **(M)** Lymphocyte (LYM) content in the blood. **(N)** Ratio of EOS to WBC in the blood. **(O)** Eosinophil (EOS) content in the blood. **(P)** Ratio of MONO to WBC in the blood. **(Q)** Monocyte (MONO) content in the blood. **(R)** Ratio of neutrophil (NEU) to WBC in the blood. **(S)** NEU content in the blood. All average data are presented as mean  $\pm$  s.e.m. WPAD represents weeks post ART discontinuation.
